# Supplementary material
Source: HighWire-hosted journal article supplement (https://molpharm.aspetjournals.org/highwire/filestream/87401/field_highwire_adjunct_files/0/464_supp_figs.pdf)
Supplement: 464_supp_figs.pdf [file 464_supp_figs.pdf]

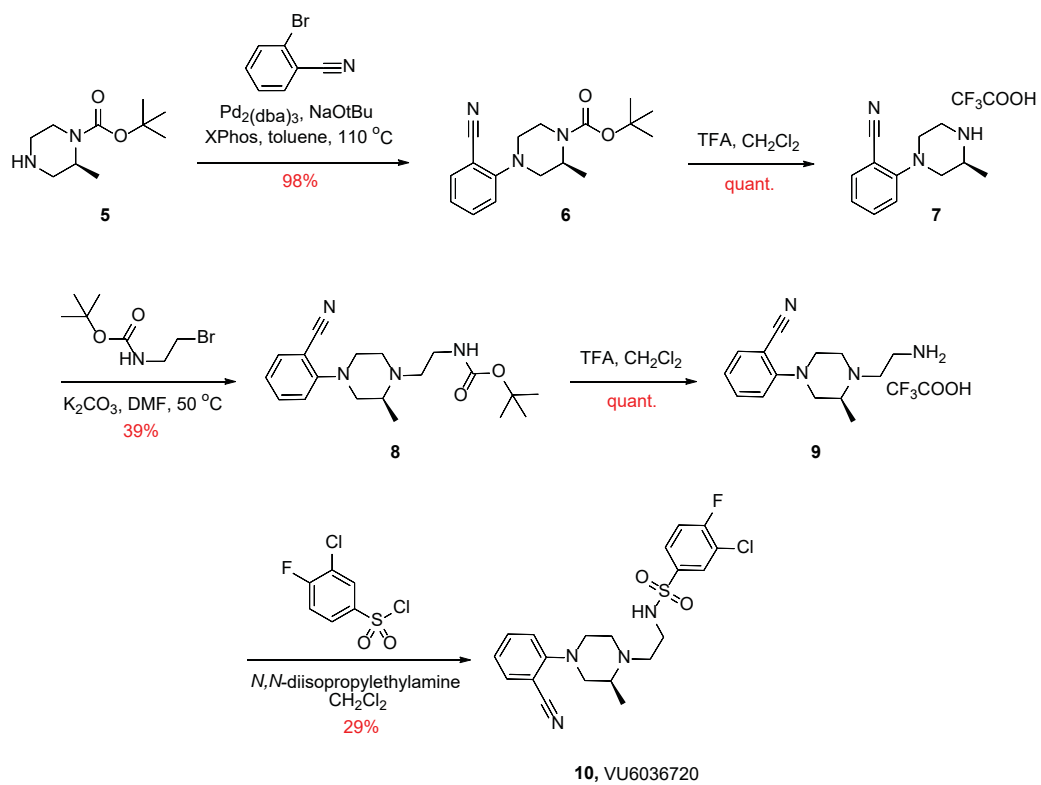

Supplemental Figure 1. Synthesis of VU6036720.

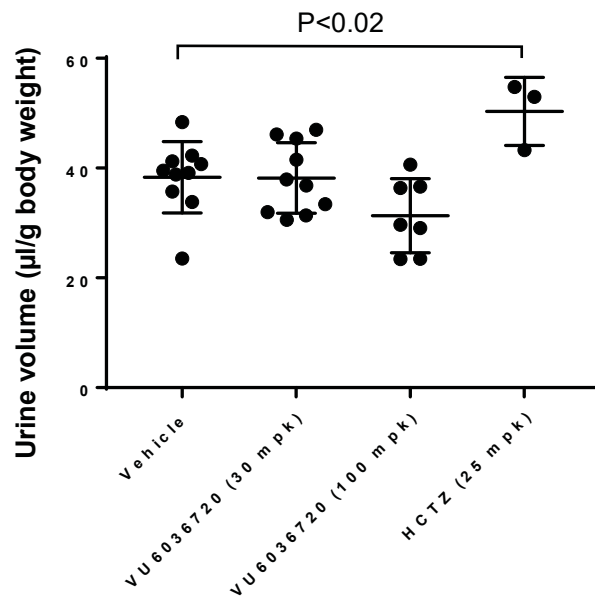

**Supplemental Figure 2. *In vivo* renal clearance studies.** Mice were gavaged with either vehicle (n=10), 30 mg/kg VU6036720 (n=10), 100 mg/kg VU6036720 (n=7), or HCTZ (n=3) and placed in metabolic cages for a 4h urine-collection period. Values are individual and means  $\pm$  SD urine volumes. There were no significant ( $P < 0.05$ ) differences between vehicle and VU6036720 treatments, whereas HCTZ induced a significant ( $P < 0.02$ ) increase in urine volume compared to vehicle treatment.
